# Supplementary material
Source: ML conference proceedings conference paper supplement (https://proceedings.mlr.press/v31/sharpnack13a.html)
Supplement: Supplementary file 1 [file sharpnack13a-supp.pdf]

## A Proofs for Section 2

*Proof of Proposition 2.* By Cirelson's theorem, we know that

$$\mathbb{P}\{\max_{v \in C} \epsilon_v \geq \mathbb{E} \max_{v \in C} \epsilon_v + u\} \leq e^{-u^2/2\sigma^2}$$

and we have that  $\mathbb{E} \min_{v \in C} \epsilon_v$  is within a constant factor of  $-\sigma\sqrt{2\log|C|}$  by the Majorizing-Measure theorem. Hence, under  $H_1^C$  we have that  $\max_{v \in C} y_v \geq \mu/\sqrt{|C|} + L^{-1}\sigma\sqrt{2\log|C|} - \sigma\sqrt{2\log(1/\delta)}$  with probability at least  $1 - \delta$  for some universal constant  $L$ . By similar reasoning, under  $H_0$  we have that  $\max_{v \in V} |y_v| \leq L\sigma\sqrt{2\log n} + \sigma\sqrt{2\log(2/\delta)}$ . We have analogous opposite bounds that prove the necessary condition. Hence, a threshold,  $\tau$ , distinguishes  $H_0$  and  $H_1$  if

$$\begin{aligned} \mu/\sqrt{|C|} + L^{-1}\sigma\sqrt{2\log|C|} - \sigma\sqrt{2\log 1/\delta} &> \tau \\ &> L\sigma\sqrt{2\log n} + \sigma\sqrt{2\log 1/\delta} \end{aligned}$$

which occurs if  $\mu/\sigma - \sqrt{2|C|\log n} = \omega(1)$ . Choosing  $C$  such that  $|C| \geq n/2$  we have the sufficient condition.  $\square$

*Proof of Proposition 3.* Under  $H_0$ ,  $\frac{1}{n} \sum_{v \in V} y_v$  is normally distributed with mean 0 and variance  $\sigma^2/n$ . Meanwhile under  $H_1^C$ ,  $\frac{1}{n} \sum_{v \in V} y_v$  is normally distributed with mean  $\mu\sqrt{|C|/n}$  and variance  $\sigma^2/n$ . Hence, the test statistic asymptotically distinguished  $H_0$  from  $H_1$  if and only if

$$\Phi\left(-\frac{\mu}{\sigma}\sqrt{\frac{|C|}{n}}\right) = o(1)$$

where  $\Phi$  is the CDF of the standard normal.  $\square$

## B Proofs for Section 3

### B.1 Properties of the Spanning Tree Wavelet Basis

**Lemma 14.** *The output  $\mathbf{B}$  of the Spanning Tree Wavelet Construction has the following properties:*

1.  $\mathbf{B}$  is an orthonormal basis of  $\mathbb{R}^n$ , in particular there are  $n$  vectors.
2.  $\mathbf{B}$  can be computed in  $O(n \log n \log d_{\mathcal{T}})$  time.

*Proof.* Before we dive into the Spanning Tree Wavelet Construction, we must analyze the FormWavelets routine. FormWavelets operates on the subtrees  $c_i$  as if they form a chain structure, and it constructs the Haar Wavelet basis over this chain structure.

A fairly straightforward inductive argument shows that, coupled with the all-ones vector, the output of FormWavelets is an orthonormal basis over the subtrees  $c_i$ . In particular, a linear combination of these vectors can be used to obtain a vector that is constant and non-zero on a single subtree and zero elsewhere.

Analyzing the Spanning Tree Wavelet Construction also proceeds by induction. On the two-node graph, running the Spanning Tree Wavelet Construction gives a basis with two elements  $(1/\sqrt{2}, 1/\sqrt{2})^T$  and  $(1/\sqrt{2}, -1/\sqrt{2})^T$  which is clearly an orthobasis. For any tree  $\mathcal{T}$ , FormWavelets gives an orthonormal basis over the subtrees, and the inductive hypothesis gives the basis for each of these individual subtrees. By induction, recursing on each subtree  $\mathcal{T}_i$  gives a set of orthonormal vectors that are also orthogonal to  $\mathbf{1}_{\mathcal{T}_i}$ . Consequently  $\mathbf{B}$  is an orthobasis.

Computing the basis involves finding a balancing vertex and then recursively forming the basis elements. Finding a balancing vertex can be done in linear time by precomputing all of the subtree sizes using a depth-first tree traversal. Computing the basis just involves another pre-order traversal of the tree, where at each level in the tree we construct  $O(\lceil \log d_{\mathcal{T}} \rceil)$  basis elements, with a total of  $O(n \lceil \log d_{\mathcal{T}} \rceil)$  non-zero coefficients. Repeating this across the  $\lceil \log n \rceil$  levels gives the running time bound.  $\square$

### B.2 Proof of Lemma 4

Before we proceed with the proof, we state and prove two results on the performance of the algorithm:

**Lemma 15.** *Let  $\mathcal{T}$  be a tree. FindBalance returns a vertex  $v$  such that the largest connected component of  $\mathcal{T} \setminus v$  is of size at most  $\lceil |\mathcal{T}|/2 \rceil$  in  $O(|\mathcal{T}|)$  time.*

*Proof.* Let the objective be the size of the largest connected components of  $\mathcal{T} \setminus v$ . Every move in FindBalance reduces the objective by at least 1 and the objective can be at most  $|\mathcal{T}| - 1$  so it must terminate in less than  $|\mathcal{T}|$  moves. Now at any step of FindBalance, if the objective is greater than  $\lceil |\mathcal{T}|/2 \rceil$ , the cumulative size of the remaining connected components is less than  $\lceil |\mathcal{T}|/2 \rceil$ . Hence, in the next step the connected component formed by these is less than  $\lceil |\mathcal{T}|/2 \rceil$ . Thus, the program cannot terminate at a move directly after the objective is greater than  $\lceil |\mathcal{T}|/2 \rceil$ .  $\square$

We will also require the following claim. Indeed, controlling the depth of the recursion in the wavelet construction is the sine qua non for controlling the sparsity,  $\|\mathbf{B}^T \mathbf{x}\|_0$ .

**Claim 16.** *The wavelet construction has recursion depth at most  $\lceil \log d_{\mathcal{T}} \rceil \lceil \log n \rceil$ .*

*Proof.* Whenever *FormWavelet* is applied it increases the height of the dendrogram by at most  $\lceil \log d_{\mathcal{T}} \rceil$ . By lemma 15 the size of the remaining components is halved, so the algorithm terminates in at most  $\lceil \log n \rceil$  steps.  $\square$

*Proof of Lemma 4.* We will show that any edge  $e \in \mathcal{T}$  supports at most  $\lceil \log d_{\mathcal{T}} \rceil \lceil \log n \rceil$  basis elements in  $\mathbf{B}$ , and this will imply the result. We will say that an edge  $e$  supports a basis element  $\mathbf{b}$  if  $e \subseteq \text{supp}(\nabla_{\mathcal{T}} \mathbf{b})$ . It follows that for a basis element  $\mathbf{b}$ , if  $\mathbf{b}^T \mathbf{x} \neq 0$  then  $\exists e$  that supports  $\mathbf{b}$ . Let  $\text{no\_basis}(e)$  be the number of basis elements that are supported by  $e$  ( $\text{no\_basis}(e) = 0$  if  $e \notin \text{supp}(\nabla_{\mathcal{T}} \mathbf{x})$ ). We then have

$$\|\mathbf{B}^T \mathbf{x}\|_0 \leq \sum_{e \in \text{supp}(\nabla_{\mathcal{T}} \mathbf{x})} \text{no\_basis}(e)$$

Consider some edge  $e$ . If  $e$  supports some subtree  $\mathcal{T}_{sub}$  (we use this interchangeably with supporting a basis element formed by partitioning  $\mathcal{T}_{sub}$  into two groups), then  $e$  supports at most one of  $\mathcal{T}_{sub}$ 's subtrees. This implies that  $\text{no\_basis}(e)$  is upper bounded by the depth of the recursion. By the claim, we find that,

$$\begin{aligned} \|\mathbf{B}^T \mathbf{x}\|_0 &\leq \sum_{e \in \text{supp}(\nabla_{\mathcal{T}} \mathbf{x})} \lceil \log d_{\mathcal{T}} \rceil \lceil \log n \rceil \\ &\leq \|\nabla_{\mathcal{T}} \mathbf{x}\|_0 \lceil \log d_{\mathcal{T}} \rceil \lceil \log n \rceil \end{aligned}$$

proving the first claim. The second claim is obvious from the fact that  $\mathcal{T}$  contains a subset of the edges in  $\mathcal{G}$ , so every cut has larger cut size in  $\mathcal{G}$  than it does in  $\mathcal{T}$ .  $\square$

### B.3 Proof of Theorem 5

*Proof.* Under the null  $\mathbf{x} = 0$ , and we have that

$$\|\mathbf{B}^T \mathbf{y}\|_{\infty} = \|\mathbf{B}^T \boldsymbol{\epsilon}\|_{\infty} < \sigma \sqrt{2 \log(n/\delta)}$$

with probability at least  $1 - \delta$ . So, as long as  $\tau = \sigma \sqrt{2 \log(n/\delta)}$  then we control the probability of false alarm (type 1 error). For a element  $\mathbf{x}$  of the alternative, let the index,  $i^*$ , achieve the maximum of  $\mathbf{B}^T \mathbf{x}$  (i.e.  $\|\mathbf{B}^T \mathbf{x}\|_{\infty} = \mathbf{B}^T \mathbf{x}|_{i^*}$ ). Then  $\mathbf{B}^T \mathbf{y}|_{i^*} \geq \mathbf{B}^T \mathbf{x}|_{i^*} - \sigma \sqrt{2 \log(1/\delta)}$  with probability at least  $1 - \delta$  and

$$\|\mathbf{B}^T \mathbf{x}|_{i^*}^2 = \|\mathbf{B}^T \mathbf{x}\|_{\infty}^2 \geq \frac{\sum_{i: (\mathbf{B}^T \mathbf{x})_i \neq 0} (\mathbf{B}^T \mathbf{x})_i^2}{\|\mathbf{B}^T \mathbf{x}\|_0} = \frac{\|\mathbf{x}\|_2^2}{\|\mathbf{B}^T \mathbf{x}\|_0}$$

Taking square roots and combining this with Lemma 4,

$$\|\mathbf{B}^T \mathbf{x}\|_{\infty} \geq \frac{\|\mathbf{x}\|_2}{\sqrt{\|\nabla_{\mathcal{T}} \mathbf{x}\|_0 \lceil \log d_{\mathcal{T}} \rceil \lceil \log n \rceil}}$$

from which we have the result that under  $H_1$ ,

$$\|\mathbf{B}^T \mathbf{y}\|_{\infty} \geq \frac{\|\mathbf{x}\|_2}{\sqrt{\|\nabla_{\mathcal{T}} \mathbf{x}\|_0 \lceil \log d_{\mathcal{T}} \rceil \lceil \log n \rceil}} - \sigma \sqrt{2 \log(1/\delta)}$$

Furthermore, because the first wavelet coefficient is just the vertex average,  $\mathbf{B}_0^T \mathbf{y}$ , we know that under  $H_1$  with probability at least  $1 - \delta$ ,

$$|\mathbf{B}_0^T \mathbf{y}| \geq \sqrt{\frac{|C|}{n}} \mu - \sigma \sqrt{2 \log(1/\delta)}$$

Forcing the maximum of these lower bounds to be greater than  $\tau$  gives us our result.  $\square$

## C Proofs For Section 5

### C.1 Proof of Corollary 12

First we restate Corollary 9 from [32]:

**Corollary 17.** *Consider an unweighted symmetric or mutual  $k$ -NN graph built from a sequence  $X_1, \dots, X_n$  drawn i.i.d. from a density  $p$ . Then there exists constants  $c_1, c_2, c_3$  such that with probability at least  $1 - c_1 n \exp(-kc_2)$  we have uniformly for all  $i \neq j$  that:*

$$\left| \frac{k}{2m} H_{ij} - \frac{k}{d_j} \right| \leq c_3 \frac{n^{2/d}}{k^{1+2/d}}$$

*Proof of Corollary 12.* We focus on the symmetric  $k$ -NN graph in which we connect  $v_i$  to  $v_j$  if  $v_i$  is in the  $k$ -nearest neighbors of  $v_j$  or vice versa. In this graph, every node has degree  $\geq k$  which will be crucial in our analysis. Our goal is to bound the effective resistance of every edge, so that we can subsequently bound  $r_{max}$  and apply Corollary 9. From the definition of  $r_e$  we have:

$$\begin{aligned} r_{ij} &= \frac{1}{2} \left( \frac{H_{ij}}{m} + \frac{H_{ji}}{m} \right) \\ &\leq 2c_3 \frac{n^{2/d}}{k^{2+2/d}} + \frac{1}{d_i} + \frac{1}{d_j} \\ &\leq 2c_3 \frac{n^{2/d}}{k^{2+2/d}} + \frac{2}{k} \end{aligned}$$

Where the first line is the definition of  $r_{ij}$ , the second line follows from Corollary 17 and the last line follows from the fact that  $d_i \geq k$  for each vertex. Since  $k(k/n)^{2/d} \rightarrow \infty$ , we see that  $r_{ij} = O(\frac{1}{k})$ . Moreover, with this scaling of  $k$ , that the probability in Corollary 17 is going to 1. We can therefore bound  $r_{max}$  as:

$$r_{max} \leq \rho \left( 2c_3 \frac{n^{2/d}}{k^{2+2/d}} + \frac{2}{k} \right) = O\left(\frac{\rho}{k}\right)$$

Since the first term is going to zero with  $n$ . Plugging in this bound on  $r_{max}$  into Theorem 9 gives the result (and substituting  $d = k$ ).  $\square$

## C.2 Proof of Corollary 13

As before, we first state Corollary 8 from [32]:

**Corollary 18.** *Consider an unweighted  $\epsilon$ -graph built from the sequence  $X_1, \dots, X_n$  drawn i.i.d. from the density  $p$ . Then there exists constants  $c_1, \dots, c_5 > 0$  such that with probability at least  $1 - c_1 n \exp(-c_2 n \epsilon^D) - c_3 \exp(-c_4 n \epsilon^D) / \epsilon^D$ , we have uniformly for all  $i \neq j$  that:*

$$\left| \frac{n \epsilon^D}{2m} H_{ij} - \frac{n \epsilon^D}{d_j} \right| \leq \frac{c_5}{n \epsilon^{D+1}}$$

*Proof of Corollary 13.* Some manipulation of the result in Corollary 18 reveals that:

$$H_{ij} \leq \frac{2m}{d_j} + \frac{2c_5 m}{n^2 \epsilon^{2D+2}}$$

Under our scaling, the second term goes to zero and the probability in Corollary 18 goes to one, so  $H_{ij} = O(m/d_j)$ . We will now give a lower bound on  $d_j$ . If  $X_i$  is in the ball of radius  $\epsilon$  centered at  $X_j$ , then we connect  $X_i$  and  $X_j$ . Thus  $d_j$  is exactly the number of vertices in the  $B(X_j; \epsilon)$ . The regularity condition on  $p$  in [32] requires that there exists constants  $\alpha$  and  $\epsilon_0$  such that for all  $\epsilon < \epsilon_0$  and for all  $x \in \text{supp}(p)$ ,  $\text{vol}(B(x; \epsilon) \cap \text{supp}(p)) \geq \alpha \text{vol}(B(x; \epsilon))$ . By this fact, the fact that the density is lower bounded by  $p_{\min}$ , and by the fact that  $\epsilon \rightarrow 0$ , we know that for sufficiently large  $n$ ,  $p(B(X_j; \epsilon)) \geq p_{\min} \alpha c_D \epsilon^D$  where  $c_D \epsilon^D$  is the volume of a  $D$ -dimensional ball of radius  $\epsilon$ . The probability that  $X_i \in B(X_j; \epsilon)$  is distributed as a Bernoulli random variable with mean  $\geq \alpha p_{\min} c_D \epsilon^D$ . By Hoeffding's inequality and a union bound we get that:

$$d_j \geq n \alpha p_{\min} c_D \epsilon^D + \sqrt{n \log(n)} = \Omega(n \epsilon^D)$$

for all vertices  $j$  with probability  $\geq 1 - 1/n$ . Using the definition of  $r_{i,j}$  along with the bound on  $H_{ij}$  and  $d_j$  we have that uniformly for all pairs  $i, j$ :

$$r_{i,j} = O\left(\frac{1}{n \epsilon^D}\right)$$

Plugging in this bound into Theorem 9 gives us the result.  $\square$
